# Supplementary material for: Rapid identification of pediatric brain tumors with differential mobility spectrometry
Source: Front Oncol. 2024 Apr 30;14:1352509. doi: 10.3389/fonc.2024.1352509 (PMC11091372; doi:10.3389/fonc.2024.1352509)
Supplement: Supplementary file 3 [file Table_1.xlsx]

## Sheet: Sheet1
	Time	Class	Subclass	Sample	Comment	Notes	Well plate	classified_as	Equal?
5	2022-07-12T11:42:49Z	Ependymoma		6C	Well plate 4_2 retry'	OK	WP4	Ependymoma	TRUE
6	2022-07-12T11:41:30Z	Ependymoma		6C	Well plate 4_2 retry'	OK	WP4	Ependymoma	TRUE
7	2022-07-12T11:40:11Z	Ependymoma		6C	Well plate 4_2 retry'	OK	WP4	Ependymoma	TRUE
8	2022-07-12T11:38:51Z	Ependymoma		6C	Well plate 4_2 retry'	OK	WP4	Pilocytic astrocytoma	FALSE
10	2022-07-12T11:33:28Z	Pilocytic astrocytoma		18A	Well plate 4'	OK	WP4	Ependymoma	FALSE
11	2022-07-12T11:32:07Z	Pilocytic astrocytoma		18A	Well plate 4'	OK	WP4	Ependymoma	FALSE
12	2022-07-12T11:30:48Z	Pilocytic astrocytoma		18A	Well plate 4'	OK	WP4	Ependymoma	FALSE
13	2022-07-12T11:29:29Z	Pilocytic astrocytoma		18A	Well plate 4'	OK	WP4	Ependymoma	FALSE
14	2022-07-12T11:28:09Z	Ependymoma		5B	Well plate 4'	OK	WP4	Ependymoma	TRUE
15	2022-07-12T11:26:50Z	Ependymoma		5B	Well plate 4'	OK	WP4	Ependymoma	TRUE
16	2022-07-12T11:25:30Z	Ependymoma		5B	Well plate 4'	OK	WP4	Ependymoma	TRUE
17	2022-07-12T11:24:11Z	Ependymoma		5B	Well plate 4'	OK	WP4	Ependymoma	TRUE
18	2022-07-12T11:22:52Z	Medulloblastoma	Undefined	7F	Well plate 4'	OK	WP4	Medulloblastoma	TRUE
19	2022-07-12T11:21:32Z	Medulloblastoma	Undefined	7F	Well plate 4'	OK	WP4	Medulloblastoma	TRUE
20	2022-07-12T11:20:13Z	Medulloblastoma	Undefined	7F	Well plate 4'	OK	WP4	Ependymoma	FALSE
21	2022-07-12T11:18:53Z	Medulloblastoma	Undefined	7F	Well plate 4'	OK	WP4	Medulloblastoma	TRUE
22	2022-07-12T11:17:33Z	Medulloblastoma	non-WNT/non-SHH	10A	Well plate 4'	OK	WP4	Medulloblastoma	TRUE
23	2022-07-12T11:16:14Z	Medulloblastoma	non-WNT/non-SHH	10A	Well plate 4'	OK	WP4	Medulloblastoma	TRUE
24	2022-07-12T11:14:55Z	Medulloblastoma	non-WNT/non-SHH	10A	Well plate 4'	OK	WP4	Medulloblastoma	TRUE
25	2022-07-12T11:13:35Z	Medulloblastoma	non-WNT/non-SHH	10A	Well plate 4'	OK	WP4	Medulloblastoma	TRUE
26	2022-07-12T11:12:17Z	Medulloblastoma	Undefined	7D	Well plate 4'	OK	WP4	Ependymoma	FALSE
27	2022-07-12T11:10:57Z	Medulloblastoma	Undefined	7D	Well plate 4'	OK	WP4	Ependymoma	FALSE
28	2022-07-12T11:09:37Z	Medulloblastoma	Undefined	7D	Well plate 4'	OK	WP4	Ependymoma	FALSE
29	2022-07-12T11:08:18Z	Medulloblastoma	Undefined	7D	Well plate 4'	OK	WP4	Ependymoma	FALSE
30	2022-07-12T11:06:58Z	Ependymoma		2D	Well plate 4'	OK	WP4	Pilocytic astrocytoma	FALSE
31	2022-07-12T11:05:39Z	Ependymoma		2D	Well plate 4'	OK	WP4	Medulloblastoma	FALSE
32	2022-07-12T11:04:20Z	Ependymoma		2D	Well plate 4'	OK	WP4	Medulloblastoma	FALSE
33	2022-07-12T11:03:00Z	Ependymoma		2D	Well plate 4'	OK	WP4	Medulloblastoma	FALSE
36	2022-07-12T10:26:38Z	Ependymoma		2C	Well plate 3'	OK	WP3	Medulloblastoma	FALSE
37	2022-07-12T10:25:18Z	Ependymoma		2C	Well plate 3'	OK	WP3	Medulloblastoma	FALSE
38	2022-07-12T10:23:59Z	Ependymoma		2C	Well plate 3'	OK	WP3	Medulloblastoma	FALSE
39	2022-07-12T10:22:40Z	Ependymoma		2C	Well plate 3'	OK	WP3	Ependymoma	TRUE
40	2022-07-12T10:21:20Z	Ependymoma		5A	Well plate 3'	OK	WP3	Ependymoma	TRUE
41	2022-07-12T10:20:02Z	Ependymoma		5A	Well plate 3'	OK	WP3	Ependymoma	TRUE
42	2022-07-12T10:18:42Z	Ependymoma		5A	Well plate 3'	OK	WP3	Ependymoma	TRUE
43	2022-07-12T10:17:22Z	Ependymoma		5A	Well plate 3'	OK	WP3	Ependymoma	TRUE
44	2022-07-12T10:16:03Z	Ependymoma		6B	Well plate 3'	OK	WP3	Ependymoma	TRUE
45	2022-07-12T10:14:43Z	Ependymoma		6B	Well plate 3'	OK	WP3	Ependymoma	TRUE
46	2022-07-12T10:13:24Z	Ependymoma		6B	Well plate 3'	OK	WP3	Pilocytic astrocytoma	FALSE
47	2022-07-12T10:12:04Z	Ependymoma		6B	Well plate 3'	OK	WP3	Ependymoma	TRUE
48	2022-07-12T10:10:45Z	Medulloblastoma	non-WNT/non-SHH	10B	Well plate 3'	OK	WP3	Medulloblastoma	TRUE
49	2022-07-12T10:09:26Z	Medulloblastoma	non-WNT/non-SHH	10B	Well plate 3'	OK	WP3	Medulloblastoma	TRUE
50	2022-07-12T10:08:06Z	Medulloblastoma	non-WNT/non-SHH	10B	Well plate 3'	OK	WP3	Medulloblastoma	TRUE
51	2022-07-12T10:06:47Z	Medulloblastoma	non-WNT/non-SHH	10B	Well plate 3'	OK	WP3	Medulloblastoma	TRUE
52	2022-07-12T10:05:27Z	Medulloblastoma	SHH	17C	Well plate 3'	OK	WP3	Medulloblastoma	TRUE
53	2022-07-12T10:04:08Z	Medulloblastoma	SHH	17C	Well plate 3'	OK	WP3	Medulloblastoma	TRUE
54	2022-07-12T10:02:48Z	Medulloblastoma	SHH	17C	Well plate 3'	OK	WP3	Medulloblastoma	TRUE
55	2022-07-12T10:01:29Z	Medulloblastoma	SHH	17C	Well plate 3'	OK	WP3	Medulloblastoma	TRUE
56	2022-07-12T10:00:09Z	Medulloblastoma	Undefined	7C	Well plate 3'	OK	WP3	Medulloblastoma	TRUE
57	2022-07-12T09:58:51Z	Medulloblastoma	Undefined	7C	Well plate 3'	OK	WP3	Ependymoma	FALSE
58	2022-07-12T09:57:30Z	Medulloblastoma	Undefined	7C	Well plate 3'	OK	WP3	Medulloblastoma	TRUE
59	2022-07-12T09:56:11Z	Medulloblastoma	Undefined	7C	Well plate 3'	OK	WP3	Medulloblastoma	TRUE
60	2022-07-12T09:54:51Z	Pilocytic astrocytoma		15A	Well plate 3'	OK	WP3	Pilocytic astrocytoma	TRUE
61	2022-07-12T09:53:32Z	Pilocytic astrocytoma		15A	Well plate 3'	OK	WP3	Pilocytic astrocytoma	TRUE
62	2022-07-12T09:52:13Z	Pilocytic astrocytoma		15A	Well plate 3'	OK	WP3	Pilocytic astrocytoma	TRUE
63	2022-07-12T09:50:54Z	Pilocytic astrocytoma		15A	Well plate 3'	OK	WP3	Pilocytic astrocytoma	TRUE
64	2022-07-12T09:49:34Z	Medulloblastoma	SHH	17E	Well plate 3'	OK	WP3	Medulloblastoma	TRUE
65	2022-07-12T09:48:16Z	Medulloblastoma	SHH	17E	Well plate 3'	OK	WP3	Medulloblastoma	TRUE
66	2022-07-12T09:46:55Z	Medulloblastoma	SHH	17E	Well plate 3'	OK	WP3	Medulloblastoma	TRUE
67	2022-07-12T09:45:36Z	Medulloblastoma	SHH	17E	Well plate 3'	OK	WP3	Ependymoma	FALSE
68	2022-07-12T09:44:16Z	Ependymoma		8C	Well plate 3'	OK	WP3	Ependymoma	TRUE
69	2022-07-12T09:42:57Z	Ependymoma		8C	Well plate 3'	OK	WP3	Ependymoma	TRUE
70	2022-07-12T09:41:38Z	Ependymoma		8C	Well plate 3'	OK	WP3	Ependymoma	TRUE
71	2022-07-12T09:40:18Z	Ependymoma		8C	Well plate 3'	OK	WP3	Medulloblastoma	FALSE
74	2022-07-12T08:25:42Z	Medulloblastoma	Undefined	7B	Well plate 2'	OK	WP2	Medulloblastoma	TRUE
75	2022-07-12T08:24:23Z	Medulloblastoma	Undefined	7B	Well plate 2'	OK	WP2	Medulloblastoma	TRUE
76	2022-07-12T08:23:03Z	Medulloblastoma	Undefined	7B	Well plate 2'	OK	WP2	Ependymoma	FALSE
77	2022-07-12T08:21:44Z	Medulloblastoma	Undefined	7B	Well plate 2'	OK	WP2	Medulloblastoma	TRUE
78	2022-07-12T08:20:25Z	Medulloblastoma	non-WNT/non-SHH	19B	Well plate 2'	OK	WP2	Medulloblastoma	TRUE
79	2022-07-12T08:19:05Z	Medulloblastoma	non-WNT/non-SHH	19B	Well plate 2'	OK	WP2	Medulloblastoma	TRUE
80	2022-07-12T08:17:46Z	Medulloblastoma	non-WNT/non-SHH	19B	Well plate 2'	OK	WP2	Medulloblastoma	TRUE
81	2022-07-12T08:16:26Z	Medulloblastoma	non-WNT/non-SHH	19B	Well plate 2'	OK	WP2	Medulloblastoma	TRUE
82	2022-07-12T08:15:07Z	Ependymoma		8B	Well plate 2'	OK	WP2	Ependymoma	TRUE
83	2022-07-12T08:13:48Z	Ependymoma		8B	Well plate 2'	OK	WP2	Pilocytic astrocytoma	FALSE
84	2022-07-12T08:12:28Z	Ependymoma		8B	Well plate 2'	OK	WP2	Ependymoma	TRUE
85	2022-07-12T08:11:09Z	Ependymoma		8B	Well plate 2'	OK	WP2	Pilocytic astrocytoma	FALSE
86	2022-07-12T08:09:50Z	Ependymoma		2B	Well plate 2'	OK	WP2	Medulloblastoma	FALSE
87	2022-07-12T08:08:30Z	Ependymoma		2B	Well plate 2'	OK	WP2	Medulloblastoma	FALSE
88	2022-07-12T08:07:11Z	Ependymoma		2B	Well plate 2'	OK	WP2	Medulloblastoma	FALSE
89	2022-07-12T08:05:51Z	Ependymoma		2B	Well plate 2'	OK	WP2	Medulloblastoma	FALSE
90	2022-07-12T08:04:32Z	Medulloblastoma	non-WNT/non-SHH	10C	Well plate 2'	OK	WP2	Medulloblastoma	TRUE
91	2022-07-12T08:03:12Z	Medulloblastoma	non-WNT/non-SHH	10C	Well plate 2'	OK	WP2	Medulloblastoma	TRUE
92	2022-07-12T08:01:53Z	Medulloblastoma	non-WNT/non-SHH	10C	Well plate 2'	OK	WP2	Medulloblastoma	TRUE
93	2022-07-12T08:00:34Z	Medulloblastoma	non-WNT/non-SHH	10C	Well plate 2'	OK	WP2	Medulloblastoma	TRUE
94	2022-07-12T07:59:15Z	Medulloblastoma	SHH	17B	Well plate 2'	OK	WP2	Medulloblastoma	TRUE
95	2022-07-12T07:57:55Z	Medulloblastoma	SHH	17B	Well plate 2'	OK	WP2	Ependymoma	FALSE
96	2022-07-12T07:56:35Z	Medulloblastoma	SHH	17B	Well plate 2'	OK	WP2	Ependymoma	FALSE
97	2022-07-12T07:55:16Z	Medulloblastoma	SHH	17B	Well plate 2'	OK	WP2	Medulloblastoma	TRUE
98	2022-07-12T07:53:56Z	Pilocytic astrocytoma		18B	Well plate 2'	OK	WP2	Ependymoma	FALSE
99	2022-07-12T07:52:37Z	Pilocytic astrocytoma		18B	Well plate 2'	OK	WP2	Ependymoma	FALSE
100	2022-07-12T07:51:17Z	Pilocytic astrocytoma		18B	Well plate 2'	OK	WP2	Ependymoma	FALSE
101	2022-07-12T07:49:58Z	Pilocytic astrocytoma		18B	Well plate 2'	OK	WP2	Pilocytic astrocytoma	TRUE
102	2022-07-12T07:48:39Z	Pilocytic astrocytoma		4A	Well plate 2'	OK	WP2	Ependymoma	FALSE
103	2022-07-12T07:47:19Z	Pilocytic astrocytoma		4A	Well plate 2'	OK	WP2	Medulloblastoma	FALSE
104	2022-07-12T07:46:00Z	Pilocytic astrocytoma		4A	Well plate 2'	OK	WP2	Medulloblastoma	FALSE
105	2022-07-12T07:44:40Z	Pilocytic astrocytoma		4A	Well plate 2'	OK	WP2	Medulloblastoma	FALSE
106	2022-07-12T07:43:21Z	Ependymoma		6A	Well plate 2'	OK	WP2	Ependymoma	TRUE
107	2022-07-12T07:42:02Z	Ependymoma		6A	Well plate 2'	OK	WP2	Ependymoma	TRUE
108	2022-07-12T07:40:42Z	Ependymoma		6A	Well plate 2'	OK	WP2	Ependymoma	TRUE
109	2022-07-12T07:39:23Z	Ependymoma		6A	Well plate 2'	OK	WP2	Medulloblastoma	FALSE
111	2022-07-12T07:06:30Z	Medulloblastoma	SHH	17A	Redo first measurement of 17A repeat'	OK	WP1	Medulloblastoma	TRUE
112	2022-07-12T07:04:20Z	Medulloblastoma	SHH	17A	Well plate 1 sample 17A repeat measurement'	OK	WP1	Medulloblastoma	TRUE
113	2022-07-12T07:03:01Z	Medulloblastoma	SHH	17A	Well plate 1 sample 17A repeat measurement'	OK	WP1	Medulloblastoma	TRUE
114	2022-07-12T07:01:43Z	Medulloblastoma	SHH	17A	Well plate 1 sample 17A repeat measurement'	OK	WP1	Medulloblastoma	TRUE
117	2022-07-12T06:53:04Z	Pilocytic astrocytoma		3A	Well plate 1'	OK	WP1	Ependymoma	FALSE
118	2022-07-12T06:51:45Z	Pilocytic astrocytoma		3A	Well plate 1'	OK	WP1	Ependymoma	FALSE
119	2022-07-12T06:50:26Z	Pilocytic astrocytoma		3A	Well plate 1'	OK	WP1	Pilocytic astrocytoma	TRUE
120	2022-07-12T06:49:06Z	Pilocytic astrocytoma		3A	Well plate 1'	OK	WP1	Ependymoma	FALSE
121	2022-07-12T06:47:46Z	Ependymoma		8A	Well plate 1'	OK	WP1	Pilocytic astrocytoma	FALSE
122	2022-07-12T06:46:27Z	Ependymoma		8A	Well plate 1'	OK	WP1	Ependymoma	TRUE
123	2022-07-12T06:45:08Z	Ependymoma		8A	Well plate 1'	OK	WP1	Ependymoma	TRUE
124	2022-07-12T06:43:49Z	Ependymoma		8A	Well plate 1'	OK	WP1	Ependymoma	TRUE
125	2022-07-12T06:42:29Z	Medulloblastoma	Undefined	7E	Well plate 1'	OK	WP1	Medulloblastoma	TRUE
126	2022-07-12T06:41:10Z	Medulloblastoma	Undefined	7E	Well plate 1'	OK	WP1	Medulloblastoma	TRUE
127	2022-07-12T06:39:51Z	Medulloblastoma	Undefined	7E	Well plate 1'	OK	WP1	Medulloblastoma	TRUE
128	2022-07-12T06:38:31Z	Medulloblastoma	Undefined	7E	Well plate 1'	OK	WP1	Medulloblastoma	TRUE
129	2022-07-12T06:37:11Z	Pilocytic astrocytoma		20A	Well plate 1'	OK	WP1	Medulloblastoma	FALSE
130	2022-07-12T06:35:52Z	Pilocytic astrocytoma		20A	Well plate 1'	OK	WP1	Medulloblastoma	FALSE
131	2022-07-12T06:34:33Z	Pilocytic astrocytoma		20A	Well plate 1'	OK	WP1	Ependymoma	FALSE
137	2022-07-12T06:26:36Z	Medulloblastoma	non-WNT/non-SHH	19A	Well plate 1'	OK	WP1	Medulloblastoma	TRUE
138	2022-07-12T06:25:17Z	Medulloblastoma	non-WNT/non-SHH	19A	Well plate 1'	OK	WP1	Medulloblastoma	TRUE
139	2022-07-12T06:23:57Z	Medulloblastoma	non-WNT/non-SHH	19A	Well plate 1'	OK	WP1	Medulloblastoma	TRUE
140	2022-07-12T06:22:38Z	Medulloblastoma	non-WNT/non-SHH	19A	Well plate 1'	OK	WP1	Pilocytic astrocytoma	FALSE
141	2022-07-12T06:21:18Z	Medulloblastoma	SHH	14A	Well plate 1'	OK	WP1	Ependymoma	FALSE
142	2022-07-12T06:19:59Z	Medulloblastoma	SHH	14A	Well plate 1'	OK	WP1	Medulloblastoma	TRUE
143	2022-07-12T06:18:40Z	Medulloblastoma	SHH	14A	Well plate 1'	OK	WP1	Medulloblastoma	TRUE
144	2022-07-12T06:17:20Z	Medulloblastoma	SHH	14A	Well plate 1'	OK	WP1	Medulloblastoma	TRUE
145	2022-07-12T06:16:01Z	Ependymoma		2A	Well plate 1'	OK	WP1	Ependymoma	TRUE
146	2022-07-12T06:14:41Z	Ependymoma		2A	Well plate 1'	OK	WP1	Ependymoma	TRUE
147	2022-07-12T06:13:22Z	Ependymoma		2A	Well plate 1'	OK	WP1	Ependymoma	TRUE
148	2022-07-12T06:12:03Z	Ependymoma		2A	Well plate 1'	OK	WP1	Ependymoma	TRUE
149	2022-07-12T06:10:43Z	Ependymoma		1A	Well plate 1'	OK	WP1	Ependymoma	TRUE
150	2022-07-12T06:09:24Z	Ependymoma		1A	Well plate 1'	OK	WP1	Ependymoma	TRUE
151	2022-07-12T06:08:05Z	Ependymoma		1A	Well plate 1'	OK	WP1	Ependymoma	TRUE
152	2022-07-12T06:06:45Z	Ependymoma		1A	Well plate 1'	OK	WP1	Ependymoma	TRUE
153	2022-07-12T06:01:24Z	Medulloblastoma	Undefined	7A	Well plate 1 test sample redo 2'	OK	WP1	Medulloblastoma	TRUE
154	2022-07-12T06:00:05Z	Medulloblastoma	Undefined	7A	Well plate 1 test sample redo 2'	OK	WP1	Ependymoma	FALSE
157	2022-07-12T05:51:44Z	Medulloblastoma	Undefined	7A	Well plate 1 test sample'	Edellistä vahvempi	WP1	Ependymoma	FALSE
158	2022-07-12T05:50:25Z	Medulloblastoma	Undefined	7A	Well plate 1 test sample'	OK	WP1	Pilocytic astrocytoma	FALSE
							True rate:	0.640288
							False rate:	0.359712
